# Supplementary material for: Theoretical investigation of 2D/2D van der Waals SbPO4/BiOClxBr1−x heterojunctions for photocatalytic water splitting
Source: Royal Society of Chemistry journal article supplement (doi:10.1039/d4cp01644k), 2024-01-01
Supplement: d4cp01644k1.pdf [file d4cp01644k1.pdf]

## Supporting information

### **Theoretical investigation of 2D/2D van der Waals SbPO<sub>4</sub>/BiOCl<sub>x</sub>Br<sub>1-x</sub> heterojunctions for photocatalytic water splitting**

Zitao Zhu, Bowei Zhou, Zhengdong Sun, Jiaxin Ma, Xiao Wang, and Meng Zhang\*,

School of Physics, East China University of Science and Technology, Shanghai  
200237, China.

\* Corresponding author: Meng Zhang. E-mail: [mzhang@ecust.edu.cn](mailto:mzhang@ecust.edu.cn)

#### **1 $\eta_{\text{HER}}$ and $\eta_{\text{OER}}$ calculations**

Fig. S1 and Fig. S2 show the Gibbs free energy steps for OER and HER, respectively. OER is conducted at BiOCl layer and HER at SbPO<sub>4</sub> layer. As shown in Figures, the values of  $\eta_{\text{HER}}$  and  $\eta_{\text{OER}}$  are 1.21eV and 0.46eV, respectively.

Gibbs free energy:  $\Delta G = \Delta E + \Delta ZPE - T\Delta S + \Delta G_U + \Delta G_{pH}$

Overpotential:  $\eta_{\text{OER}} = \Delta G_{\text{max}} / e - 1.23$

OER:

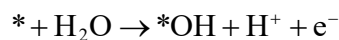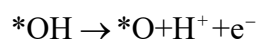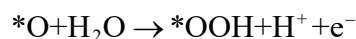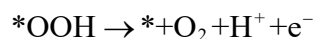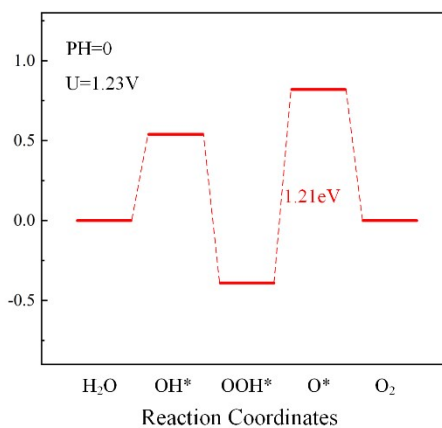

Fig. S1 Gibbs free energy steps for the Oxygen Evolution Reaction at different adsorption sites.

HER:

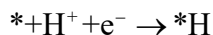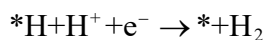

Overpotential:  $\eta_{HER} = \Delta G_{max} / e$

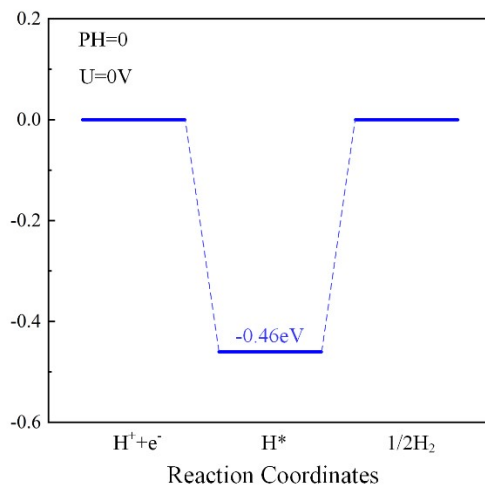

Fig. S2 Gibbs free energy steps for the Hydrogen Evolution Reaction at different adsorption sites

We attempted to apply COHP analysis to investigate the interaction strength within the  $SbPO_4/BiOCl$  heterojunction during hydrogen evolution reactions, particularly focusing on hydrogen atom adsorption. The result is shown in the Fig. S3.

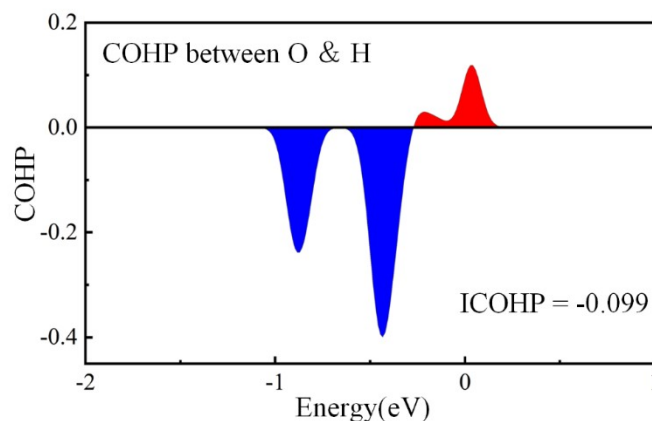

Fig. S3 crystal orbital Hamilton population of the adsorbed H on  $SbPO_4/BiOCl$ .

As shown in Fig. S3, most of the bonding component is present in the occupied state. Only a partial antibonding component exists near the Fermi energy level. The value of ICOHP is calculated to be -0.099, so the constructed hydrogen atom adsorption

model is bonding stable.

## 2 STH efficiency calculations

The  $\eta_{\text{STH}}$  of the heterojunction can be found by the following equation:

$$\eta_{\text{STH}} = \eta_{\text{abs}} \times \eta_{\text{cu}} \quad \#(1)$$

where  $\eta_{\text{abs}}$  is the light absorption efficiency and  $\eta_{\text{cu}}$  is the carrier utilisation efficiency. The  $\eta_{\text{abs}}$  can be explained by

$$\eta_{\text{abs}} = \frac{\int_{E_g}^{\infty} P(\hbar\omega) d(\hbar\omega)}{\int_0^{\infty} P(\hbar\omega) d(\hbar\omega)} \quad \#(2)$$

where  $E_g$  is the bandgap and  $P(\hbar\omega)$  is the AM1.5G solar energy flux at the photon energy  $\hbar\omega$ . The  $\eta_{\text{cu}}$  can be explained by

$$\eta_{\text{cu}} = 0.5 \times \frac{\Delta G \times \int_{E'}^{\infty} \frac{P(\hbar\omega)}{\hbar\omega} d(\hbar\omega)}{\int_{E_g}^{\infty} P(\hbar\omega) d(\hbar\omega)} \quad \#(3)$$

where  $\Delta G$  is the water redox potential (1.23 eV) and  $E'$  is the used photon energy for water splitting and can be expressed by

$$E' = \begin{cases} \max(E_{gA}, E_{gB}), (\chi_A(\text{H}_2) \geq \eta_{\text{HER}}, \chi_B(\text{O}_2) \geq \eta_{\text{OER}}) \\ \max(E_{gA} + \eta_{\text{HER}} - \chi_A(\text{H}_2), E_{gB}), (\chi_A(\text{H}_2) < \eta_{\text{HER}}, \chi_B(\text{O}_2) \geq \eta_{\text{OER}}) \\ \max(E_{gA}, E_{gB} + \eta_{\text{OER}} - \chi_B(\text{O}_2)), (\chi_A(\text{H}_2) < \eta_{\text{HER}}, \chi_B(\text{O}_2) < \eta_{\text{OER}}) \\ \max(E_{gA} + \eta_{\text{HER}} - \chi_A(\text{H}_2), E_{gB} + \eta_{\text{OER}} - \chi_B(\text{O}_2)), (\chi_A(\text{H}_2) < \eta_{\text{HER}}, \chi_B(\text{O}_2) < \eta_{\text{OER}}) \end{cases} \quad \#(4)$$

where  $\chi(\text{H}_2)$  and  $\chi(\text{O}_2)$  are the differences between the CBM and the  $\text{H}^+/\text{H}_2$  potential, the VBM and the  $\text{O}_2/\text{H}_2\text{O}$  potential, respectively.  $E_{gA}$ ,  $E_{gB}$  are the band gaps of the two materials respectively. Considering the energy loss during carrier migration between different materials, the required overpotentials for HER and OER are assumed to be 0.5 eV and 1.3 eV, respectively. The  $\eta_{\text{STH}}$  of the heterojunction is calculated to be 10.68%.

Reference:

- [1] Zhu H, Zhang X, Nie Y, et al. 2D/2D Janus BiTeCl/GeSe vdW heterostructure as a robust high-performance S-scheme photocatalyst for water splitting[J]. *Applied Surface Science*, 2023, 635: 157694.
