# Supplementary figures and images for: Theoretical investigation of 2D/2D van der Waals SbPO4/BiOClxBr1−x heterojunctions for photocatalytic water splitting
Source: Royal Society of Chemistry journal article supplement (doi:10.1039/d4cp01644k), 2024-01-01

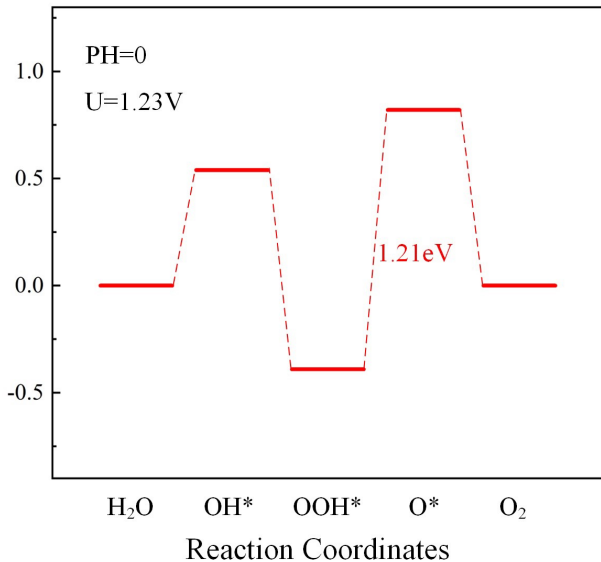

Supplement: d4cp01644k2.pdf [file d4cp01644k2.pdf]

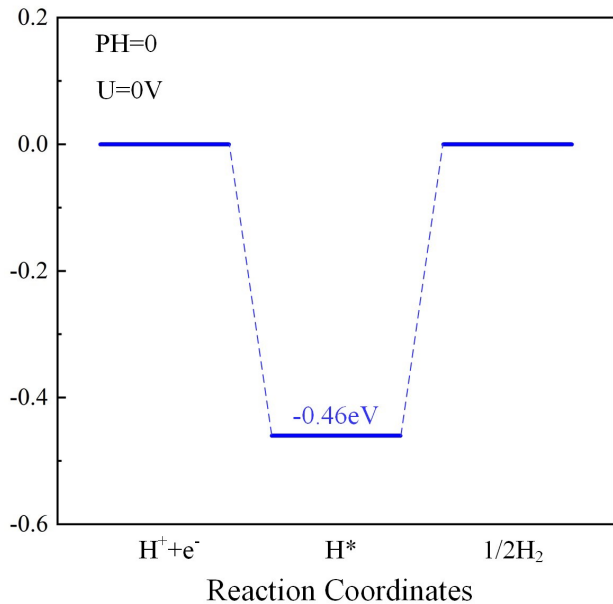

Supplement: d4cp01644k3.pdf [file d4cp01644k3.pdf]

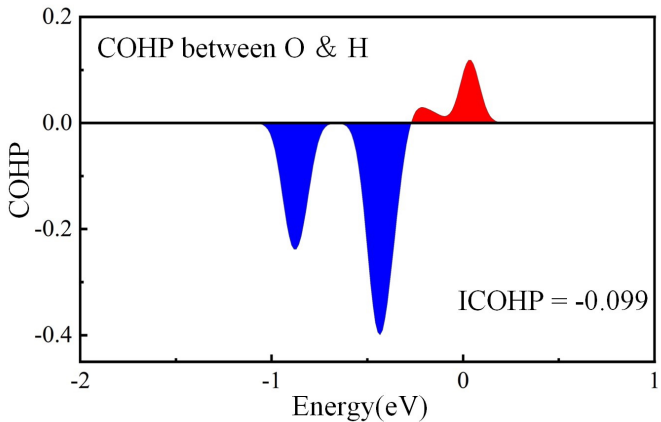

Supplement: d4cp01644k4.pdf [file d4cp01644k4.pdf]
